# Supplementary material
Source: HighWire-hosted journal article supplement (https://www.cmajopen.ca/highwire/filestream/80949/field_highwire_adjunct_files/2/open-2015-0030-reporting-checklist.pdf)
Supplement: open-2015-0030-reporting-checklist.pdf [file open-2015-0030-reporting-checklist.pdf]

Consolidated criteria for reporting qualitative studies (COREQ): 32-item checklist

| No                                                     | Item                                     | Guide questions/description                                                                                                                      | Author response                                                                                                                                |
|--------------------------------------------------------|------------------------------------------|--------------------------------------------------------------------------------------------------------------------------------------------------|------------------------------------------------------------------------------------------------------------------------------------------------|
| <b>Domain 1:<br/>Research team<br/>and reflexivity</b> |                                          |                                                                                                                                                  |                                                                                                                                                |
| Personal Characteristics                               |                                          |                                                                                                                                                  |                                                                                                                                                |
| 1.                                                     | Interviewer/facilitator                  | Which author/s conducted the interview or focus group?                                                                                           | Robin Urquhart [RU]; stated in text (methods section)                                                                                          |
| 2.                                                     | Credentials                              | What were the researcher's credentials? <i>E.g. PhD, MD</i>                                                                                      | PhD; indicated on author byline                                                                                                                |
| 3.                                                     | Occupation                               | What was their occupation at the time of the study?                                                                                              | Assistant Professor, Surgery                                                                                                                   |
| 4.                                                     | Gender                                   | Was the researcher male or female?                                                                                                               | Female; indicated in text via use of pronoun "she" (methods section)                                                                           |
| 5.                                                     | Experience and training                  | What experience or training did the researcher have?                                                                                             | PhD + PI on various studies using qualitative methods                                                                                          |
| Relationship with participants                         |                                          |                                                                                                                                                  |                                                                                                                                                |
| 6.                                                     | Relationship established                 | Was a relationship established prior to study commencement?                                                                                      | Stated in text (methods section)                                                                                                               |
| 7.                                                     | Participant knowledge of the interviewer | What did the participants know about the researcher? <i>e.g. personal goals, reasons for doing the research</i>                                  | Stated in text (methods section)                                                                                                               |
| 8.                                                     | Interviewer characteristics              | What characteristics were reported about the interviewer/facilitator? <i>e.g. Bias, assumptions, reasons and interests in the research topic</i> | Reasons for interest stated in text, <i>i.e.</i> , prior research on referral and adjuvant therapy utilization patterns (introduction section) |
| <b>Domain 2: study design</b>                          |                                          |                                                                                                                                                  |                                                                                                                                                |

|                       |                                       |                                                                                                                                                                 |                                                                                    |
|-----------------------|---------------------------------------|-----------------------------------------------------------------------------------------------------------------------------------------------------------------|------------------------------------------------------------------------------------|
| Theoretical framework |                                       |                                                                                                                                                                 |                                                                                    |
| 9.                    | Methodological orientation and Theory | What methodological orientation was stated to underpin the study? <i>e.g. grounded theory, discourse analysis, ethnography, phenomenology, content analysis</i> | Grounded theory; stated in text (methods section)                                  |
| Participant selection |                                       |                                                                                                                                                                 |                                                                                    |
| 10.                   | Sampling                              | How were participants selected? <i>e.g. purposive, convenience, consecutive, snowball</i>                                                                       | Purposive; stated in text (methods section)                                        |
| 11.                   | Method of approach                    | How were participants approached? <i>e.g. face-to-face, telephone, mail, email</i>                                                                              | Email or telephone; stated in text (methods section)                               |
| 12.                   | Sample size                           | How many participants were in the study?                                                                                                                        | 29; stated in text (results section)                                               |
| 13.                   | Non-participation                     | How many people refused to participate or dropped out? Reasons?                                                                                                 | 2; stated in text (results section)                                                |
| Setting               |                                       |                                                                                                                                                                 |                                                                                    |
| 14.                   | Setting of data collection            | Where was the data collected? <i>e.g. home, clinic, workplace</i>                                                                                               | Work office or telephone; stated in text (methods section)                         |
| 15.                   | Presence of non-participants          | Was anyone else present besides the participants and researchers?                                                                                               | No; stated in text (methods section)                                               |
| 16.                   | Description of sample                 | What are the important characteristics of the sample? <i>e.g. demographic data, date</i>                                                                        | Location of practice, sex, years of practice; all stated in text (results section) |
| Data collection       |                                       |                                                                                                                                                                 |                                                                                    |
| 17.                   | Interview guide                       | Were questions, prompts, guides provided by the authors? Was it pilot tested?                                                                                   | Yes and yes; interview guide was pilot tested, stated in text (methods section)    |
| 18.                   | Repeat interviews                     | Were repeat interviews carried out? If yes, how many?                                                                                                           | No; stated in text (results section)                                               |
| 19.                   | Audio/visual recording                | Did the research use audio or visual recording to collect the data?                                                                                             | Yes, audio recording; stated in text (methods section)                             |

|                                            |                                |                                                                          |                                                                                                                                                            |
|--------------------------------------------|--------------------------------|--------------------------------------------------------------------------|------------------------------------------------------------------------------------------------------------------------------------------------------------|
| 20.                                        | Field notes                    | Were field notes made during and/or after the interview or focus group?  | Yes; stated in text (methods section)                                                                                                                      |
| 21.                                        | Duration                       | What was the duration of the interviews or focus group?                  | 20-49 minutes; stated in text (results section)                                                                                                            |
| 22.                                        | Data saturation                | Was data saturation discussed?                                           | Yes (methods section)                                                                                                                                      |
| 23.                                        | Transcripts returned           | Were transcripts returned to participants for comment and/or correction? | No, but participants were provided a summary of the preliminary findings; stated in text (methods section)                                                 |
| <b>Domain 3:<br/>analysis and findings</b> |                                |                                                                          |                                                                                                                                                            |
| Data analysis                              |                                |                                                                          |                                                                                                                                                            |
| 24.                                        | Number of data coders          | How many data coders coded the data?                                     | Two coded first 14 transcripts, one coded remaining 15 transcripts; stated in text (methods section)                                                       |
| 25.                                        | Description of the coding tree | Did authors provide a description of the coding tree?                    | Authors provided description of how coding tree was developed (methods section)                                                                            |
| 26.                                        | Derivation of themes           | Were themes identified in advance or derived from the data?              | Derived from the data; analysis process discussed in text (methods section)                                                                                |
| 27.                                        | Software                       | What software, if applicable, was used to manage the data?               | Yes, NVivo; stated in text (methods section)                                                                                                               |
| 28.                                        | Participant checking           | Did participants provide feedback on the findings?                       | Participants were provided a summary of the preliminary findings and invited to provide feedback (methods section); four responded confirming the findings |
| Reporting                                  |                                |                                                                          |                                                                                                                                                            |
| 29.                                        | Quotations presented           | Were participant quotations presented to illustrate                      | Yes (results section)                                                                                                                                      |

the themes / findings? Was each quotation identified? e.g. *participant number*

---

|     |                              |                                                                        |                                                                                          |
|-----|------------------------------|------------------------------------------------------------------------|------------------------------------------------------------------------------------------|
| 30. | Data and findings consistent | Was there consistency between the data presented and the findings?     | Yes                                                                                      |
| 31. | Clarity of major themes      | Were major themes clearly presented in the findings?                   | Yes                                                                                      |
| 32. | Clarity of minor themes      | Is there a description of diverse cases or discussion of minor themes? | The main categories comprise all substantive issues that emerged during data collection. |

---
